# Supplementary material for: Physiological and genomic signatures of evolutionary thermal adaptation in redband trout from extreme climates
Source: PubMed Central journal article supplement (PMC6183465; doi:10.1111/eva.12672), 2018-07-20
Supplement: EVA-11-1686-s004.pdf [file EVA-11-1686-s004.pdf]

**Table S1** Annotation of outlier loci.

| Outlier    | Chr   | Chr_pos  | Candidate gene (5 kb) | Environment Variable | p-value | R2   | Allele_diff |
|------------|-------|----------|-----------------------|----------------------|---------|------|-------------|
| 957741_40  | omy01 | 4044115  |                       | Summer temperature   | 0.357   | 0.28 | 0.74        |
| 462534_55  | omy01 | 4228524  | NR5A2_CHICK;          | Summer temperature   | 0.254   | 0.40 | 1.00        |
| 502540_64  | omy01 | 42976129 |                       | Summer temperature   | 0.030   | 0.83 | 0.93        |
| 688734_11  | omy01 | 43109936 |                       | Summer temperature   | 0.057   | 0.75 | 0.89        |
| 1235980_40 | omy01 | 43119933 |                       | Summer temperature   | 0.111   | 0.63 | 1.00        |
| 815286_13  | omy01 | 44172181 | IRX5_MOUSE;           | Summer temperature   | 0.029   | 0.84 | 0.83        |
| 315622_38  | omy01 | 45704573 |                       | Summer temperature   | 0.294   | 0.35 | 0.77        |
| 1273068_70 | omy01 | 54004414 |                       | Summer temperature   | 0.178   | 0.51 | 0.95        |
| 889712_44  | omy01 | 58633407 |                       | Summer temperature   | 0.341   | 0.30 | 0.75        |
| 715269_22  | omy02 | 23946227 | MBOA5_RAT;            | Summer temperature   | 0.150   | 0.55 | 1.00        |
| 1251715_11 | omy02 | 32957825 |                       | Summer temperature   | 0.053   | 0.76 | 1.00        |
| 1208243_74 | omy02 | 36611582 |                       | Summer temperature   | 0.046   | 0.78 | 0.81        |
| 695584_26  | omy02 | 39565560 | RTXE_DROME;           | Summer temperature   | 0.357   | 0.28 | 0.87        |
| 1248723_21 | omy02 | 39638851 |                       | Summer temperature   | 0.392   | 0.25 | 0.95        |
| 738251_62  | omy02 | 39881722 |                       | Summer temperature   | 0.389   | 0.25 | 0.88        |
| 489977_49  | omy02 | 39926707 |                       | Summer temperature   | 0.406   | 0.24 | 0.91        |
| 704721_51  | omy02 | 39947579 |                       | Summer temperature   | 0.342   | 0.30 | 0.95        |
| 704721_48  | omy02 | 39947579 |                       | Summer temperature   | 0.342   | 0.30 | 0.95        |
| 332424_13  | omy02 | 41516296 |                       | Summer temperature   | 0.424   | 0.22 | 0.90        |
| 355877_48  | omy02 | 45340302 |                       | Summer temperature   | 0.210   | 0.46 | 1.00        |
| 593312_21  | omy02 | 47922866 |                       | Summer temperature   | 0.335   | 0.30 | 0.82        |
| 371915_33  | omy02 | 49596054 |                       | Summer temperature   | 0.366   | 0.27 | 0.94        |
| 416990_70  | omy02 | 50791681 | ANLN_XENLA;           | Summer temperature   | 0.356   | 0.28 | 0.94        |
| 177716_8   | omy02 | 51610079 |                       | Summer temperature   | 0.312   | 0.33 | 0.92        |
| 766033_44  | omy02 | 62594530 |                       | Summer temperature   | 0.312   | 0.33 | 1.00        |
| 1039547_44 | omy02 | 70940519 |                       | Summer temperature   | 0.107   | 0.63 | 1.00        |
| 510763_23  | omy02 | 80094964 |                       | Summer temperature   | 0.357   | 0.28 | 0.71        |
| 689461_14  | omy02 | 80485643 |                       | Summer temperature   | 0.357   | 0.28 | 0.86        |
| 1101676_48 | omy02 | 82961170 |                       | Summer temperature   | 0.357   | 0.28 | 0.85        |
| 575808_57  | omy03 | 27945468 |                       | Summer temperature   | 0.030   | 0.83 | 0.78        |
| 633401_11  | omy03 | 72482646 |                       | Summer temperature   | 0.831   | 0.02 | 0.73        |
| 633401_12  | omy03 | 72482646 |                       | Summer temperature   | 0.831   | 0.02 | 0.73        |
| 836509_22  | omy03 | 77385369 |                       | Summer temperature   | 0.172   | 0.52 | 1.00        |
| 836509_71  | omy03 | 77385369 |                       | Summer temperature   | 0.231   | 0.43 | 0.93        |
| 1408323_36 | omy03 | 79883950 |                       | Summer temperature   | 0.429   | 0.22 | 0.92        |
| 1229224_45 | omy03 | 84202266 |                       | Summer temperature   | 0.425   | 0.22 | 0.85        |
| 523026_21  | omy04 | 1833076  | TRI25_HUMAN;          | Summer temperature   | 0.157   | 0.54 | 0.93        |
| 216197_62  | omy04 | 9822010  |                       | Summer temperature   | 0.120   | 0.61 | 1.00        |
| 743803_72  | omy04 | 16355399 |                       | Summer temperature   | 0.091   | 0.67 | 1.00        |
| 743803_73  | omy04 | 16355399 |                       | Summer temperature   | 0.091   | 0.67 | 1.00        |
| 254757_59  | omy04 | 28317023 |                       | Summer temperature   | 0.357   | 0.28 | 0.82        |
| 679393_40  | omy04 | 34605832 |                       | Summer temperature   | 0.289   | 0.35 | 0.95        |
| 103064_59  | omy04 | 35553700 |                       | Summer temperature   | 0.173   | 0.51 | 1.00        |
| 401414_49  | omy04 | 36991814 |                       | Summer temperature   | 0.019   | 0.88 | 0.91        |

| Outlier    | Chr   | Chr_pos  | Candidate gene (5 kb) | Environment Variable | p-value | R2   | Allele_diff |
|------------|-------|----------|-----------------------|----------------------|---------|------|-------------|
| 401414_73  | omy04 | 36991814 |                       | Summer temperature   | 0.019   | 0.88 | 0.91        |
| 557041_61  | omy04 | 44179816 |                       | Summer temperature   | 0.357   | 0.28 | 0.73        |
| 1287826_8  | omy04 | 44849446 |                       | Summer temperature   | 0.357   | 0.28 | 0.77        |
| 1129791_51 | omy04 | 48111472 |                       | Summer temperature   | 0.349   | 0.29 | 0.87        |
| 916146_31  | omy04 | 48111543 |                       | Summer temperature   | 0.350   | 0.29 | 0.91        |
| 1291212_73 | omy04 | 53529817 | KLF11_MOUSE;          | Summer temperature   | 0.338   | 0.30 | 0.90        |
| 277587_55  | omy04 | 64756914 | FAXC_XENTR;           | Summer temperature   | 0.243   | 0.41 | 0.94        |
| 881628_60  | omy04 | 68169866 |                       | Summer temperature   | 0.223   | 0.44 | 0.94        |
| 350721_53  | omy04 | 68188765 |                       | Summer temperature   | 0.235   | 0.42 | 0.94        |
| 1341292_60 | omy04 | 72252509 |                       | Summer temperature   | 0.323   | 0.32 | 1.00        |
| 799503_25  | omy04 | 72411485 |                       | Summer temperature   | 0.381   | 0.26 | 0.83        |
| 118667_52  | omy05 | 4121661  |                       | Summer temperature   | 0.270   | 0.38 | 1.00        |
| 397770_13  | omy05 | 21018003 |                       | Summer temperature   | 0.062   | 0.74 | 0.93        |
| 942120_42  | omy05 | 25653447 |                       | Summer temperature   | 0.336   | 0.30 | 1.00        |
| 380144_69  | omy05 | 37908771 | CLIP1_CHICK;          | Summer temperature   | 0.144   | 0.56 | 0.95        |
| 831445_12  | omy05 | 42552455 | S27A4_MACFA;          | Summer temperature   | 0.270   | 0.38 | 0.93        |
| 1254520_71 | omy05 | 43359039 |                       | Summer temperature   | 0.390   | 0.25 | 0.89        |
| 1254520_74 | omy05 | 43359039 |                       | Summer temperature   | 0.390   | 0.25 | 0.89        |
| 660016_57  | omy05 | 45879032 | CRA1A_DANRE;          | Summer temperature   | 0.022   | 0.86 | 0.90        |
| 188762_37  | omy05 | 49028926 |                       | Summer temperature   | 0.268   | 0.38 | 0.88        |
| 406393_48  | omy05 | 49649886 |                       | Summer temperature   | 0.244   | 0.41 | 0.94        |
| 71649_27   | omy05 | 49776110 |                       | Summer temperature   | 0.258   | 0.39 | 0.88        |
| 915061_9   | omy05 | 49798638 |                       | Summer temperature   | 0.305   | 0.34 | 0.86        |
| 522988_63  | omy05 | 52988055 | PTBP1_PIG;            | Summer temperature   | 0.252   | 0.40 | 1.00        |
| 848843_69  | omy05 | 53025657 |                       | Summer temperature   | 0.050   | 0.77 | 1.00        |
| 1018106_54 | omy05 | 58285130 | SCC4_XENTR;           | Summer temperature   | 0.288   | 0.36 | 0.86        |
| 1157846_63 | omy05 | 83220712 |                       | Summer temperature   | 0.257   | 0.39 | 0.88        |
| 1119251_60 | omy05 | 85293115 | TOP1_XENLA;           | Summer temperature   | 0.392   | 0.25 | 0.86        |
| 39971_40   | omy05 | 85647746 |                       | Summer temperature   | 0.357   | 0.28 | 0.87        |
| 215478_46  | omy05 | 86962207 |                       | Summer temperature   | 0.375   | 0.26 | 0.88        |
| 1426088_8  | omy05 | 90136102 |                       | Summer temperature   | 0.318   | 0.32 | 0.93        |
| 1426088_37 | omy05 | 90136102 |                       | Summer temperature   | 0.318   | 0.32 | 0.93        |
| 205005_74  | omy06 | 7061986  |                       | Summer temperature   | 0.288   | 0.36 | 0.85        |
| 396806_32  | omy06 | 7861552  |                       | Summer temperature   | 0.396   | 0.25 | 0.87        |
| 774949_9   | omy06 | 10260208 |                       | Summer temperature   | 0.357   | 0.28 | 0.91        |
| 119288_8   | omy06 | 10308290 |                       | Summer temperature   | 0.357   | 0.28 | 0.94        |
| 704454_51  | omy06 | 10388840 |                       | Summer temperature   | 0.357   | 0.28 | 0.83        |
| 88314_18   | omy06 | 10582757 |                       | Summer temperature   | 0.307   | 0.34 | 0.86        |
| 710542_33  | omy06 | 10744038 |                       | Summer temperature   | 0.357   | 0.28 | 0.95        |
| 746690_45  | omy06 | 12108548 |                       | Summer temperature   | 0.336   | 0.30 | 0.83        |
| 487424_49  | omy06 | 12142386 |                       | Summer temperature   | 0.349   | 0.29 | 0.83        |
| 487424_50  | omy06 | 12142386 |                       | Summer temperature   | 0.349   | 0.29 | 0.83        |
| 350156_69  | omy06 | 13534601 |                       | Summer temperature   | 0.332   | 0.31 | 0.76        |
| 350156_61  | omy06 | 13534601 |                       | Summer temperature   | 0.332   | 0.31 | 0.76        |
| 1426409_7  | omy06 | 14567442 |                       | Summer temperature   | 0.369   | 0.27 | 0.92        |
| 542209_53  | omy06 | 29085232 | SETBP_HUMAN;          | Summer temperature   | 0.162   | 0.53 | 0.83        |

| Outlier    | Chr   | Chr_pos  | Candidate gene (5 kb) | Environment Variable | p-value | R2   | Allele_diff |
|------------|-------|----------|-----------------------|----------------------|---------|------|-------------|
| 542209_11  | omy06 | 29085232 | SETBP_HUMAN;          | Summer temperature   | 0.162   | 0.53 | 0.83        |
| 1256848_23 | omy06 | 35516309 |                       | Summer temperature   | 0.024   | 0.86 | 1.00        |
| 1108238_38 | omy06 | 44887051 |                       | Summer temperature   | 0.223   | 0.44 | 1.00        |
| 875605_41  | omy06 | 52742547 |                       | Summer temperature   | 0.251   | 0.40 | 0.92        |
| 348463_74  | omy06 | 67740231 |                       | Summer temperature   | 0.009   | 0.92 | 1.00        |
| 956537_23  | omy06 | 70166187 |                       | Summer temperature   | 0.009   | 0.92 | 0.86        |
| 1324185_69 | omy07 | 19602963 |                       | Summer temperature   | 0.381   | 0.26 | 0.89        |
| 999167_69  | omy07 | 20063353 |                       | Summer temperature   | 0.357   | 0.28 | 0.83        |
| 543211_28  | omy07 | 20124964 |                       | Summer temperature   | 0.365   | 0.27 | 0.86        |
| 1133292_43 | omy07 | 20687594 |                       | Summer temperature   | 0.312   | 0.33 | 0.82        |
| 881182_53  | omy07 | 20731114 |                       | Summer temperature   | 0.252   | 0.40 | 0.94        |
| 399473_17  | omy07 | 20906248 |                       | Summer temperature   | 0.357   | 0.28 | 0.78        |
| 588890_48  | omy07 | 50062942 | KCNC4_HUMAN;          | Summer temperature   | 0.298   | 0.34 | 1.00        |
| 534487_10  | omy07 | 50319612 | MEP50_PONAB;          | Summer temperature   | 0.331   | 0.31 | 1.00        |
| 534487_8   | omy07 | 50319612 | MEP50_PONAB;          | Summer temperature   | 0.331   | 0.31 | 1.00        |
| 93093_33   | omy07 | 50320679 | MEP50_PONAB;          | Summer temperature   | 0.331   | 0.31 | 1.00        |
| 367067_40  | omy08 | 317280   | RTJK_DROFU;           | Summer temperature   | 0.297   | 0.35 | 0.82        |
| 1064777_57 | omy08 | 18818057 | PLMN_MOUSE;           | Summer temperature   | 0.315   | 0.33 | 0.94        |
| 576566_10  | omy08 | 19009047 |                       | Summer temperature   | 0.307   | 0.33 | 0.88        |
| 909287_34  | omy08 | 19111866 |                       | Summer temperature   | 0.223   | 0.44 | 0.88        |
| 258577_38  | omy08 | 21936008 |                       | Summer temperature   | 0.341   | 0.30 | 1.00        |
| 237919_51  | omy08 | 22049037 |                       | Summer temperature   | 0.339   | 0.30 | 0.80        |
| 1321892_18 | omy08 | 27067013 |                       | Summer temperature   | 0.313   | 0.33 | 0.95        |
| 625694_35  | omy08 | 27271191 |                       | Summer temperature   | 0.357   | 0.28 | 0.73        |
| 442753_29  | omy08 | 59875983 |                       | Summer temperature   | 0.562   | 0.12 | 1.00        |
| 1042521_50 | omy08 | 81362675 | AGO3_DANRE;           | Summer temperature   | 0.268   | 0.38 | 0.94        |
| 889586_67  | omy09 | 8851736  |                       | Summer temperature   | 0.089   | 0.67 | 0.88        |
| 1426449_30 | omy09 | 13795005 |                       | Summer temperature   | 0.004   | 0.96 | 0.90        |
| 968136_24  | omy09 | 15897911 |                       | Summer temperature   | 0.289   | 0.36 | 1.00        |
| 1013109_7  | omy09 | 19270747 |                       | Summer temperature   | 0.127   | 0.59 | 0.83        |
| 946675_9   | omy09 | 19454966 |                       | Summer temperature   | 0.033   | 0.83 | 1.00        |
| 946675_23  | omy09 | 19454966 |                       | Summer temperature   | 0.033   | 0.82 | 1.00        |
| 89285_47   | omy09 | 19520057 |                       | Summer temperature   | 0.031   | 0.83 | 0.89        |
| 89285_32   | omy09 | 19520057 |                       | Summer temperature   | 0.032   | 0.83 | 0.89        |
| 1279926_18 | omy09 | 19541263 |                       | Summer temperature   | 0.045   | 0.79 | 1.00        |
| 882071_56  | omy09 | 20023549 |                       | Summer temperature   | 0.339   | 0.30 | 0.87        |
| 285661_56  | omy09 | 21140455 |                       | Summer temperature   | 0.063   | 0.74 | 0.80        |
| 293822_22  | omy09 | 21949487 |                       | Summer temperature   | 0.306   | 0.34 | 0.88        |
| 1152869_63 | omy09 | 21955496 |                       | Summer temperature   | 0.348   | 0.29 | 0.88        |
| 842577_51  | omy09 | 22278139 |                       | Summer temperature   | 0.306   | 0.34 | 0.88        |
| 376877_12  | omy09 | 22674820 |                       | Summer temperature   | 0.317   | 0.32 | 0.82        |
| 1087137_17 | omy09 | 22862274 |                       | Summer temperature   | 0.312   | 0.33 | 0.92        |
| 1087137_11 | omy09 | 22862274 |                       | Summer temperature   | 0.312   | 0.33 | 0.88        |
| 932179_15  | omy09 | 22916807 | STIM2_HUMAN;          | Summer temperature   | 0.288   | 0.36 | 0.88        |
| 105825_49  | omy09 | 23254572 |                       | Summer temperature   | 0.339   | 0.30 | 0.73        |
| 766382_65  | omy09 | 30632114 | ATX1_RAT;             | Summer temperature   | 0.312   | 0.33 | 0.94        |

| Outlier    | Chr   | Chr_pos  | Candidate gene (5 kb) | Environment Variable | p-value | R2   | Allele_diff |
|------------|-------|----------|-----------------------|----------------------|---------|------|-------------|
| 663794_61  | omy09 | 35438680 |                       | Summer temperature   | 0.034   | 0.82 | 1.00        |
| 928978_46  | omy09 | 35446609 |                       | Summer temperature   | 0.091   | 0.67 | 0.93        |
| 928978_40  | omy09 | 35446609 |                       | Summer temperature   | 0.091   | 0.67 | 0.93        |
| 1302081_51 | omy09 | 39030425 |                       | Summer temperature   | 0.348   | 0.29 | 0.87        |
| 184543_64  | omy09 | 42890194 |                       | Summer temperature   | 0.362   | 0.28 | 0.85        |
| 1009396_14 | omy09 | 52415125 | ORML2_HUMAN;          | Summer temperature   | 0.034   | 0.82 | 1.00        |
| 132163_66  | omy09 | 66713142 |                       | Summer temperature   | 0.066   | 0.73 | 0.85        |
| 344249_55  | omy10 | 6575898  |                       | Summer temperature   | 0.270   | 0.38 | 0.92        |
| 488986_24  | omy10 | 6660371  |                       | Summer temperature   | 0.227   | 0.43 | 1.00        |
| 104080_45  | omy10 | 8463921  |                       | Summer temperature   | 0.312   | 0.33 | 0.89        |
| 1012347_63 | omy10 | 8938956  |                       | Summer temperature   | 0.070   | 0.72 | 1.00        |
| 975217_23  | omy10 | 10719642 |                       | Summer temperature   | 0.218   | 0.45 | 0.00        |
| 33207_44   | omy10 | 26169043 |                       | Summer temperature   | 0.331   | 0.31 | 1.00        |
| 189813_27  | omy10 | 26537379 | TIM22_RAT;            | Summer temperature   | 0.075   | 0.71 | 1.00        |
| 399557_62  | omy10 | 30594738 |                       | Summer temperature   | 0.312   | 0.33 | 0.89        |
| 630313_29  | omy10 | 33150796 | PLST_HUMAN;           | Summer temperature   | 0.293   | 0.35 | 0.82        |
| 630313_30  | omy10 | 33150796 | PLST_HUMAN;           | Summer temperature   | 0.293   | 0.35 | 0.82        |
| 1096957_73 | omy10 | 34967850 |                       | Summer temperature   | 0.357   | 0.28 | 0.75        |
| 494855_14  | omy10 | 35930634 |                       | Summer temperature   | 0.074   | 0.71 | 0.72        |
| 590544_8   | omy10 | 35934453 |                       | Summer temperature   | 0.089   | 0.67 | 0.89        |
| 55326_44   | omy10 | 40513690 |                       | Summer temperature   | 0.344   | 0.30 | 1.00        |
| 513234_42  | omy10 | 41329805 |                       | Summer temperature   | 0.863   | 0.01 | 0.94        |
| 1015104_29 | omy10 | 44073669 |                       | Summer temperature   | 0.441   | 0.21 | 0.95        |
| 1015104_61 | omy10 | 44073669 |                       | Summer temperature   | 0.441   | 0.21 | 0.95        |
| 553363_52  | omy10 | 46317415 |                       | Summer temperature   | 0.136   | 0.58 | 1.00        |
| 553363_19  | omy10 | 46317415 |                       | Summer temperature   | 0.150   | 0.55 | 1.00        |
| 989212_32  | omy10 | 47926715 |                       | Summer temperature   | 0.312   | 0.33 | 0.76        |
| 256264_29  | omy10 | 48436980 | ABCG4_HUMAN;          | Summer temperature   | 0.382   | 0.26 | 0.88        |
| 624481_68  | omy10 | 52647785 |                       | Summer temperature   | 0.260   | 0.39 | 0.94        |
| 59308_30   | omy10 | 54805826 |                       | Summer temperature   | 0.345   | 0.29 | 0.93        |
| 1039822_24 | omy10 | 55770155 |                       | Summer temperature   | 0.312   | 0.33 | 0.82        |
| 1039822_18 | omy10 | 55770155 |                       | Summer temperature   | 0.312   | 0.33 | 0.87        |
| 601329_18  | omy10 | 57111764 |                       | Summer temperature   | 0.331   | 0.31 | 0.87        |
| 1306584_69 | omy11 | 1044105  |                       | Summer temperature   | 0.312   | 0.33 | 0.81        |
| 1340949_71 | omy11 | 7247256  |                       | Summer temperature   | 0.266   | 0.38 | 0.93        |
| 965899_18  | omy11 | 15845793 |                       | Summer temperature   | 0.367   | 0.27 | 0.90        |
| 1357762_31 | omy11 | 28806494 |                       | Summer temperature   | 0.013   | 0.90 | 1.00        |
| 1357762_69 | omy11 | 28806494 |                       | Summer temperature   | 0.013   | 0.90 | 1.00        |
| 800767_56  | omy11 | 31005410 |                       | Summer temperature   | 0.093   | 0.66 | 0.94        |
| 560189_59  | omy11 | 33429236 |                       | Summer temperature   | 0.085   | 0.68 | 1.00        |
| 1534217_39 | omy11 | 37570389 |                       | Summer temperature   | 0.183   | 0.50 | 1.00        |
| 140792_14  | omy11 | 37739571 |                       | Summer temperature   | 0.056   | 0.75 | 1.00        |
| 132289_71  | omy11 | 37739642 |                       | Summer temperature   | 0.081   | 0.69 | 1.00        |
| 853708_23  | omy11 | 42991302 | GSTT1_BOVIN;          | Summer temperature   | 0.030   | 0.83 | 1.00        |
| 1343968_7  | omy11 | 45645377 |                       | Summer temperature   | 0.159   | 0.54 | 1.00        |
| 958797_19  | omy11 | 46843377 |                       | Summer temperature   | 0.266   | 0.38 | 0.94        |

| Outlier    | Chr   | Chr_pos  | Candidate gene (5 kb) | Environment Variable | p-value | R2   | Allele_diff |
|------------|-------|----------|-----------------------|----------------------|---------|------|-------------|
| 955104_64  | omy11 | 47017227 | LHX6_HUMAN;           | Summer temperature   | 0.223   | 0.44 | 0.88        |
| 955104_57  | omy11 | 47017227 | LHX6_HUMAN;           | Summer temperature   | 0.223   | 0.44 | 0.88        |
| 41048_48   | omy11 | 47608147 | LMO41_XENTR;          | Summer temperature   | 0.267   | 0.38 | 0.87        |
| 41048_6    | omy11 | 47608147 | LMO41_XENTR;          | Summer temperature   | 0.267   | 0.38 | 0.87        |
| 1002080_15 | omy11 | 48549859 |                       | Summer temperature   | 0.051   | 0.77 | 1.00        |
| 450277_42  | omy11 | 51552876 |                       | Summer temperature   | 0.357   | 0.28 | 0.83        |
| 563040_69  | omy11 | 56752920 |                       | Summer temperature   | 0.037   | 0.81 | 0.88        |
| 683374_14  | omy11 | 60428610 | ATD1A_DANRE;          | Summer temperature   | 0.337   | 0.30 | 0.23        |
| 808068_20  | omy11 | 69076879 |                       | Summer temperature   | 0.283   | 0.36 | 0.88        |
| 285889_42  | omy11 | 73805316 |                       | Summer temperature   | 0.250   | 0.40 | 0.88        |
| 1214983_17 | omy12 | 24922179 | UGT3_PLEPL;           | Summer temperature   | 0.061   | 0.74 | 0.88        |
| 1124932_66 | omy12 | 30922222 |                       | Summer temperature   | 0.288   | 0.36 | 0.88        |
| 559729_12  | omy12 | 36373104 |                       | Summer temperature   | 0.312   | 0.33 | 0.76        |
| 1113153_25 | omy12 | 36375168 |                       | Summer temperature   | 0.348   | 0.29 | 0.87        |
| 724650_5   | omy12 | 36994111 |                       | Summer temperature   | 0.369   | 0.27 | 0.81        |
| 1050535_68 | omy12 | 37147217 |                       | Summer temperature   | 0.495   | 0.17 | 0.94        |
| 1009423_15 | omy12 | 38735050 |                       | Summer temperature   | 0.366   | 0.27 | 0.94        |
| 1101246_33 | omy12 | 39853504 |                       | Summer temperature   | 0.343   | 0.30 | 0.88        |
| 1101246_37 | omy12 | 39853504 |                       | Summer temperature   | 0.343   | 0.30 | 0.88        |
| 937912_60  | omy12 | 40777630 |                       | Summer temperature   | 0.312   | 0.33 | 0.83        |
| 1114677_45 | omy12 | 42735570 |                       | Summer temperature   | 0.341   | 0.30 | 0.94        |
| 1149671_33 | omy12 | 42778784 | POL3_DROME;           | Summer temperature   | 0.299   | 0.34 | 1.00        |
| 1265613_31 | omy12 | 42859678 |                       | Summer temperature   | 0.341   | 0.30 | 0.94        |
| 246529_72  | omy12 | 43489509 |                       | Summer temperature   | 0.295   | 0.35 | 1.00        |
| 135973_52  | omy12 | 58592726 |                       | Summer temperature   | 0.297   | 0.35 | 0.92        |
| 962826_13  | omy12 | 59481516 |                       | Summer temperature   | 0.312   | 0.33 | 0.83        |
| 399357_14  | omy12 | 59877844 |                       | Summer temperature   | 0.369   | 0.27 | 0.82        |
| 160213_51  | omy12 | 62907678 |                       | Summer temperature   | 0.339   | 0.30 | 0.94        |
| 160213_32  | omy12 | 62907678 |                       | Summer temperature   | 0.339   | 0.30 | 0.82        |
| 311377_42  | omy12 | 69557088 |                       | Summer temperature   | 0.268   | 0.38 | 0.88        |
| 311377_65  | omy12 | 69557088 |                       | Summer temperature   | 0.268   | 0.38 | 0.88        |
| 1340330_35 | omy12 | 72036930 |                       | Summer temperature   | 0.303   | 0.34 | 0.89        |
| 1340330_6  | omy12 | 72036930 |                       | Summer temperature   | 0.303   | 0.34 | 0.89        |
| 411070_30  | omy12 | 73118561 | NBR1_MOUSE;           | Summer temperature   | 0.232   | 0.43 | 0.93        |
| 444883_37  | omy13 | 2286603  |                       | Summer temperature   | 0.049   | 0.77 | 0.95        |
| 470874_34  | omy13 | 17701663 | APOL3_HUMAN;          | Summer temperature   | 0.221   | 0.44 | 0.95        |
| 1046388_14 | omy13 | 18511653 |                       | Summer temperature   | 0.141   | 0.57 | 1.00        |
| 488679_74  | omy13 | 24129068 |                       | Summer temperature   | 0.163   | 0.53 | 0.95        |
| 488679_60  | omy13 | 24129068 |                       | Summer temperature   | 0.163   | 0.53 | 0.95        |
| 579465_52  | omy13 | 44310006 |                       | Summer temperature   | 0.151   | 0.55 | 1.00        |
| 1110689_48 | omy13 | 48249247 | HVM16_MOUSE;          | Summer temperature   | 0.078   | 0.70 | 1.00        |
| 1269576_54 | omy14 | 678680   | KLH38_DANRE;          | Summer temperature   | 0.312   | 0.33 | 0.88        |
| 289129_36  | omy14 | 23095778 |                       | Summer temperature   | 0.441   | 0.21 | 0.83        |
| 289129_73  | omy14 | 23095778 |                       | Summer temperature   | 0.458   | 0.19 | 0.83        |
| 176457_16  | omy14 | 27550006 | SEM6D_PONAB;          | Summer temperature   | 0.109   | 0.63 | 1.00        |
| 1023339_44 | omy14 | 30088251 | NECP1_MOUSE;          | Summer temperature   | 0.009   | 0.93 | 1.00        |

| Outlier    | Chr   | Chr_pos  | Candidate gene (5 kb) | Environment Variable | p-value | R2   | Allele_diff |
|------------|-------|----------|-----------------------|----------------------|---------|------|-------------|
| 418329_63  | omy14 | 31370031 |                       | Summer temperature   | 0.262   | 0.39 | 1.00        |
| 776275_64  | omy14 | 33661544 |                       | Summer temperature   | 0.366   | 0.27 | 1.00        |
| 1168475_47 | omy14 | 36571681 |                       | Summer temperature   | 0.270   | 0.38 | 1.00        |
| 180937_17  | omy14 | 37881011 |                       | Summer temperature   | 0.252   | 0.40 | 0.93        |
| 952496_69  | omy14 | 39795303 | CERS2_HUMAN;          | Summer temperature   | 0.273   | 0.37 | 1.00        |
| 863581_29  | omy14 | 41414086 |                       | Summer temperature   | 0.248   | 0.41 | 0.94        |
| 649598_24  | omy14 | 42382032 |                       | Summer temperature   | 0.261   | 0.39 | 1.00        |
| 352231_31  | omy14 | 42382103 |                       | Summer temperature   | 0.261   | 0.39 | 1.00        |
| 357482_22  | omy14 | 42513537 |                       | Summer temperature   | 0.280   | 0.37 | 1.00        |
| 107163_13  | omy14 | 43513607 |                       | Summer temperature   | 0.237   | 0.42 | 0.93        |
| 1090652_11 | omy14 | 43742288 |                       | Summer temperature   | 0.253   | 0.40 | 1.00        |
| 1090652_31 | omy14 | 43742288 |                       | Summer temperature   | 0.253   | 0.40 | 1.00        |
| 991172_39  | omy14 | 43800034 |                       | Summer temperature   | 0.234   | 0.42 | 0.94        |
| 814477_37  | omy14 | 43872826 |                       | Summer temperature   | 0.251   | 0.40 | 1.00        |
| 814477_49  | omy14 | 43872826 |                       | Summer temperature   | 0.251   | 0.40 | 1.00        |
| 1095928_54 | omy14 | 43876815 |                       | Summer temperature   | 0.251   | 0.40 | 0.94        |
| 1327338_8  | omy14 | 44000814 | SLIK4_MOUSE;          | Summer temperature   | 0.312   | 0.33 | 0.88        |
| 1113126_58 | omy14 | 44173188 |                       | Summer temperature   | 0.258   | 0.39 | 0.94        |
| 459173_18  | omy14 | 44262642 |                       | Summer temperature   | 0.245   | 0.41 | 0.93        |
| 312350_72  | omy14 | 44319254 |                       | Summer temperature   | 0.268   | 0.38 | 1.00        |
| 312350_66  | omy14 | 44319254 |                       | Summer temperature   | 0.268   | 0.38 | 1.00        |
| 361248_48  | omy14 | 44503526 |                       | Summer temperature   | 0.325   | 0.32 | 0.93        |
| 793510_11  | omy14 | 44507405 |                       | Summer temperature   | 0.263   | 0.39 | 0.93        |
| 793510_74  | omy14 | 44507405 |                       | Summer temperature   | 0.266   | 0.38 | 0.93        |
| 1042314_48 | omy14 | 44542472 |                       | Summer temperature   | 0.269   | 0.38 | 1.00        |
| 137536_60  | omy14 | 44548687 |                       | Summer temperature   | 0.266   | 0.38 | 1.00        |
| 300943_14  | omy14 | 44730005 |                       | Summer temperature   | 0.272   | 0.37 | 1.00        |
| 300943_13  | omy14 | 44730005 |                       | Summer temperature   | 0.272   | 0.37 | 1.00        |
| 964188_63  | omy14 | 44746595 |                       | Summer temperature   | 0.249   | 0.40 | 1.00        |
| 42582_34   | omy14 | 44750874 |                       | Summer temperature   | 0.287   | 0.36 | 0.93        |
| 904942_22  | omy14 | 45359496 |                       | Summer temperature   | 0.300   | 0.34 | 0.94        |
| 526596_44  | omy14 | 45387390 |                       | Summer temperature   | 0.260   | 0.39 | 1.00        |
| 187502_42  | omy14 | 46227448 |                       | Summer temperature   | 0.127   | 0.59 | 1.00        |
| 187502_63  | omy14 | 46227448 |                       | Summer temperature   | 0.127   | 0.59 | 1.00        |
| 34284_27   | omy14 | 46821864 |                       | Summer temperature   | 0.304   | 0.34 | 0.07        |
| 926290_31  | omy14 | 47396831 |                       | Summer temperature   | 0.258   | 0.39 | 1.00        |
| 1158891_51 | omy14 | 48328162 |                       | Summer temperature   | 0.261   | 0.39 | 1.00        |
| 1158891_52 | omy14 | 48328162 |                       | Summer temperature   | 0.264   | 0.39 | 1.00        |
| 1310332_18 | omy14 | 51807177 | CD40L_CANFA;          | Summer temperature   | 0.339   | 0.30 | 0.79        |
| 722873_18  | omy14 | 60593229 |                       | Summer temperature   | 0.002   | 0.97 | 0.96        |
| 937809_58  | omy14 | 64376611 |                       | Summer temperature   | 0.022   | 0.86 | 0.81        |
| 496358_46  | omy14 | 66660217 | RNSL3_DANRE;          | Summer temperature   | 0.041   | 0.80 | 0.94        |
| 1130700_20 | omy14 | 70497575 |                       | Summer temperature   | 0.084   | 0.68 | 0.93        |
| 1130700_23 | omy14 | 70497575 |                       | Summer temperature   | 0.084   | 0.68 | 0.93        |
| 92976_45   | omy14 | 72017078 | STAG2_MOUSE;          | Summer temperature   | 0.041   | 0.80 | 0.90        |
| 199616_43  | omy14 | 73617841 |                       | Summer temperature   | 0.070   | 0.72 | 1.00        |

| Outlier    | Chr   | Chr_pos  | Candidate gene (5 kb) | Environment Variable | p-value | R2   | Allele_diff |
|------------|-------|----------|-----------------------|----------------------|---------|------|-------------|
| 190858_55  | omy14 | 77402388 |                       | Summer temperature   | 0.389   | 0.25 | 0.93        |
| 280703_56  | omy14 | 79778356 |                       | Summer temperature   | 0.339   | 0.30 | 1.00        |
| 1136807_72 | omy15 | 12691587 |                       | Summer temperature   | 0.331   | 0.31 | 0.85        |
| 1039753_45 | omy15 | 13032108 | NEBU_HUMAN;           | Summer temperature   | 0.309   | 0.33 | 0.88        |
| 730580_6   | omy15 | 13036784 | NEBU_HUMAN;           | Summer temperature   | 0.336   | 0.30 | 0.89        |
| 347904_60  | omy15 | 14688894 |                       | Summer temperature   | 0.368   | 0.27 | 0.85        |
| 960725_19  | omy15 | 22696254 |                       | Summer temperature   | 0.401   | 0.24 | 0.86        |
| 613213_52  | omy15 | 25854675 |                       | Summer temperature   | 0.108   | 0.63 | 0.94        |
| 483230_27  | omy15 | 26179733 |                       | Summer temperature   | 0.050   | 0.77 | 1.00        |
| 476285_61  | omy15 | 26237921 | GPR17_HUMAN;          | Summer temperature   | 0.028   | 0.84 | 0.91        |
| 266735_60  | omy15 | 33842752 |                       | Summer temperature   | 0.115   | 0.62 | 0.80        |
| 1075812_26 | omy15 | 35641422 | SAX_LITCT;            | Summer temperature   | 0.355   | 0.28 | 0.90        |
| 1075812_20 | omy15 | 35641422 | SAX_LITCT;            | Summer temperature   | 0.355   | 0.28 | 0.90        |
| 104963_67  | omy15 | 44749437 |                       | Summer temperature   | 0.222   | 0.44 | 0.88        |
| 1075573_25 | omy15 | 48382098 |                       | Summer temperature   | 0.032   | 0.83 | 0.85        |
| 933872_49  | omy15 | 49178517 |                       | Summer temperature   | 0.416   | 0.23 | 0.92        |
| 391551_44  | omy16 | 1101057  | ISM1_DANRE;           | Summer temperature   | 0.258   | 0.39 | 0.75        |
| 1093043_73 | omy16 | 6325228  |                       | Summer temperature   | 0.405   | 0.24 | 0.92        |
| 925324_37  | omy16 | 15268607 |                       | Summer temperature   | 0.044   | 0.79 | 0.88        |
| 925324_61  | omy16 | 15268607 |                       | Summer temperature   | 0.125   | 0.60 | 0.88        |
| 461819_24  | omy16 | 16282391 |                       | Summer temperature   | 0.926   | 0.00 | 0.83        |
| 400278_51  | omy16 | 19010590 |                       | Summer temperature   | 0.357   | 0.28 | 0.95        |
| 776381_70  | omy16 | 19051340 |                       | Summer temperature   | 0.357   | 0.28 | 0.95        |
| 1018813_32 | omy16 | 20191801 | DAAF3_DANRE;          | Summer temperature   | 0.357   | 0.28 | 0.91        |
| 1189573_64 | omy16 | 24653528 |                       | Summer temperature   | 0.115   | 0.62 | 0.93        |
| 550983_62  | omy16 | 30589751 |                       | Summer temperature   | 0.134   | 0.58 | 0.89        |
| 1029009_47 | omy16 | 36292057 |                       | Summer temperature   | 0.083   | 0.69 | 0.92        |
| 922585_64  | omy16 | 37496888 |                       | Summer temperature   | 0.150   | 0.55 | 0.90        |
| 795318_51  | omy16 | 39787660 |                       | Summer temperature   | 0.691   | 0.06 | 0.90        |
| 291255_71  | omy16 | 40079617 | PKHG5_HUMAN;          | Summer temperature   | 0.097   | 0.66 | 1.00        |
| 432785_65  | omy16 | 43567699 |                       | Summer temperature   | 0.035   | 0.82 | 1.00        |
| 747316_44  | omy16 | 44388301 |                       | Summer temperature   | 0.371   | 0.27 | 0.95        |
| 981106_20  | omy16 | 45647659 | CC018_MOUSE;          | Summer temperature   | 0.343   | 0.30 | 0.87        |
| 292453_60  | omy16 | 48785312 | PKHM2_HUMAN;          | Summer temperature   | 0.023   | 0.86 | 0.96        |
| 945036_20  | omy16 | 48786474 | PKHM2_HUMAN;          | Summer temperature   | 0.010   | 0.92 | 0.91        |
| 421873_34  | omy16 | 54131928 |                       | Summer temperature   | 0.061   | 0.74 | 0.95        |
| 640890_43  | omy16 | 62095767 |                       | Summer temperature   | 0.339   | 0.30 | 0.79        |
| 934031_19  | omy16 | 62146178 |                       | Summer temperature   | 0.339   | 0.30 | 0.94        |
| 1155618_23 | omy16 | 63375642 |                       | Summer temperature   | 0.298   | 0.34 | 0.85        |
| 788258_64  | omy16 | 64197452 |                       | Summer temperature   | 0.349   | 0.29 | 0.75        |
| 456238_30  | omy16 | 64250602 |                       | Summer temperature   | 0.454   | 0.20 | 0.90        |
| 92064_74   | omy17 | 18782026 |                       | Summer temperature   | 0.332   | 0.31 | 0.82        |
| 942468_60  | omy17 | 18785677 |                       | Summer temperature   | 0.339   | 0.30 | 0.82        |
| 942468_9   | omy17 | 18785677 |                       | Summer temperature   | 0.339   | 0.30 | 0.82        |
| 1239779_52 | omy17 | 19605560 |                       | Summer temperature   | 0.033   | 0.83 | 0.94        |
| 678694_13  | omy17 | 19926752 | NAC1_CAVPO;           | Summer temperature   | 0.038   | 0.81 | 0.78        |

| Outlier    | Chr   | Chr_pos  | Candidate gene (5 kb) | Environment Variable | p-value | R2   | Allele_diff |
|------------|-------|----------|-----------------------|----------------------|---------|------|-------------|
| 777293_5   | omy17 | 33436739 | BSN_RAT;              | Summer temperature   | 0.045   | 0.79 | 0.86        |
| 151933_31  | omy17 | 41920671 |                       | Summer temperature   | 0.339   | 0.30 | 0.64        |
| 733707_11  | omy17 | 42593396 |                       | Summer temperature   | 0.306   | 0.34 | 0.88        |
| 1124473_9  | omy17 | 64456207 | UBA1_RABIT;           | Summer temperature   | 0.128   | 0.59 | 0.89        |
| 460489_69  | omy17 | 65311406 |                       | Summer temperature   | 0.407   | 0.24 | 0.89        |
| 877963_61  | omy17 | 70273614 |                       | Summer temperature   | 0.235   | 0.42 | 1.00        |
| 730749_10  | omy18 | 5835028  | TVC_HUMAN;            | Summer temperature   | 0.056   | 0.76 | 0.88        |
| 684500_10  | omy18 | 13982097 |                       | Summer temperature   | 0.305   | 0.34 | 0.88        |
| 688708_62  | omy18 | 19032568 |                       | Summer temperature   | 0.022   | 0.86 | 1.00        |
| 408454_12  | omy18 | 19041375 | S100B_HUMAN;          | Summer temperature   | 0.037   | 0.81 | 0.75        |
| 840777_70  | omy18 | 19067383 |                       | Summer temperature   | 0.339   | 0.30 | 0.75        |
| 721616_11  | omy18 | 25827563 |                       | Summer temperature   | 0.270   | 0.38 | 1.00        |
| 222205_61  | omy18 | 29376937 |                       | Summer temperature   | 0.312   | 0.33 | 0.94        |
| 222205_48  | omy18 | 29376937 |                       | Summer temperature   | 0.312   | 0.33 | 0.81        |
| 157218_66  | omy18 | 38042510 |                       | Summer temperature   | 0.041   | 0.80 | 1.00        |
| 1303146_64 | omy18 | 49954334 |                       | Summer temperature   | 0.133   | 0.58 | 0.93        |
| 945496_48  | omy18 | 58255293 |                       | Summer temperature   | 0.026   | 0.85 | 0.92        |
| 900900_61  | omy19 | 10472264 |                       | Summer temperature   | 0.357   | 0.28 | 0.74        |
| 914118_35  | omy19 | 10776741 |                       | Summer temperature   | 0.349   | 0.29 | 0.86        |
| 548005_65  | omy19 | 18330455 |                       | Summer temperature   | 0.102   | 0.64 | 1.00        |
| 903110_14  | omy19 | 25631299 |                       | Summer temperature   | 0.642   | 0.08 | 0.33        |
| 903110_12  | omy19 | 25631299 |                       | Summer temperature   | 0.654   | 0.08 | 0.35        |
| 495567_13  | omy19 | 33589582 |                       | Summer temperature   | 0.308   | 0.33 | 0.90        |
| 648147_41  | omy19 | 37732258 |                       | Summer temperature   | 0.137   | 0.58 | 1.00        |
| 304108_52  | omy19 | 53000175 |                       | Summer temperature   | 0.166   | 0.52 | 0.86        |
| 304358_28  | omy19 | 53395249 |                       | Summer temperature   | 0.015   | 0.90 | 1.00        |
| 330442_47  | omy20 | 1359668  |                       | Summer temperature   | 0.190   | 0.49 | 0.94        |
| 210725_62  | omy20 | 8669592  |                       | Summer temperature   | 0.419   | 0.23 | 1.00        |
| 844911_45  | omy20 | 26412663 |                       | Summer temperature   | 0.344   | 0.30 | 0.95        |
| 809732_15  | omy20 | 33568935 |                       | Summer temperature   | 0.055   | 0.76 | 1.00        |
| 802634_52  | omy20 | 33665034 |                       | Summer temperature   | 0.305   | 0.34 | 0.82        |
| 802634_53  | omy20 | 33665034 |                       | Summer temperature   | 0.305   | 0.34 | 0.82        |
| 1307208_56 | omy20 | 34105354 |                       | Summer temperature   | 0.306   | 0.34 | 0.94        |
| 1437141_65 | omy20 | 34442760 |                       | Summer temperature   | 0.089   | 0.67 | 0.93        |
| 327989_27  | omy21 | 9030106  |                       | Summer temperature   | 0.219   | 0.44 | 0.88        |
| 1411478_58 | omy21 | 11889194 |                       | Summer temperature   | 0.354   | 0.29 | 1.00        |
| 1340057_70 | omy21 | 12270405 |                       | Summer temperature   | 0.370   | 0.27 | 0.93        |
| 1190996_52 | omy21 | 12909232 | FACR1_XENLA;          | Summer temperature   | 0.364   | 0.28 | 0.94        |
| 111506_37  | omy21 | 15119211 |                       | Summer temperature   | 0.325   | 0.32 | 1.00        |
| 183630_20  | omy21 | 18374297 |                       | Summer temperature   | 0.209   | 0.46 | 0.80        |
| 305807_40  | omy21 | 31691004 |                       | Summer temperature   | 0.061   | 0.74 | 0.81        |
| 343820_60  | omy21 | 32902922 |                       | Summer temperature   | 0.199   | 0.47 | 0.94        |
| 955637_74  | omy21 | 33060816 |                       | Summer temperature   | 0.343   | 0.30 | 0.96        |
| 1155837_43 | omy21 | 35557820 | UFSP1_MOUSE;          | Summer temperature   | 0.281   | 0.36 | 1.00        |
| 870524_30  | omy21 | 48865056 | PER1_HUMAN;           | Summer temperature   | 0.312   | 0.33 | 1.00        |
| 870524_46  | omy21 | 48865056 | PER1_HUMAN;           | Summer temperature   | 0.312   | 0.33 | 0.80        |



| Outlier    | Chr   | Chr_pos  | Candidate gene (5 kb) | Environment Variable | p-value | R2   | Allele_diff |
|------------|-------|----------|-----------------------|----------------------|---------|------|-------------|
| 387385_45  | omy22 | 8462908  |                       | Summer temperature   | 0.264   | 0.39 | 0.87        |
| 528036_58  | omy22 | 13248005 |                       | Summer temperature   | 0.258   | 0.39 | 0.93        |
| 541522_21  | omy22 | 22797506 | TFG_HUMAN;            | Summer temperature   | 0.334   | 0.31 | 0.88        |
| 571587_13  | omy22 | 23632026 | SRPX_HUMAN;           | Summer temperature   | 0.142   | 0.57 | 1.00        |
| 810318_27  | omy22 | 28977007 |                       | Summer temperature   | 0.312   | 0.33 | 0.82        |
| 284362_34  | omy22 | 28977078 |                       | Summer temperature   | 0.306   | 0.34 | 0.94        |
| 965813_6   | omy22 | 29311638 | 5HT1F_RAT;            | Summer temperature   | 0.312   | 0.33 | 0.80        |
| 547597_12  | omy23 | 1381246  |                       | Summer temperature   | 0.043   | 0.79 | 0.83        |
| 354845_49  | omy23 | 2829447  |                       | Summer temperature   | 0.041   | 0.80 | 0.96        |
| 888377_12  | omy23 | 2882309  |                       | Summer temperature   | 0.042   | 0.80 | 0.81        |
| 1097165_43 | omy23 | 12732810 |                       | Summer temperature   | 0.312   | 0.33 | 0.85        |
| 1416384_47 | omy23 | 15000252 |                       | Summer temperature   | 0.173   | 0.51 | 1.00        |
| 161904_7   | omy23 | 15462158 |                       | Summer temperature   | 0.353   | 0.29 | 1.00        |
| 1308564_46 | omy23 | 32881212 |                       | Summer temperature   | 0.223   | 0.44 | 1.00        |
| 399409_20  | omy23 | 41039665 |                       | Summer temperature   | 0.230   | 0.43 | 1.00        |
| 1179293_44 | omy23 | 41084961 |                       | Summer temperature   | 0.415   | 0.23 | 1.00        |
| 1071884_47 | omy23 | 43093872 |                       | Summer temperature   | 0.281   | 0.36 | 0.88        |
| 96299_62   | omy24 | 22014095 |                       | Summer temperature   | 0.036   | 0.81 | 0.94        |
| 548904_14  | omy24 | 34851772 | NOS_LYMST;            | Summer temperature   | 0.013   | 0.90 | 0.89        |
| 263484_20  | omy24 | 37284760 |                       | Summer temperature   | 0.319   | 0.32 | 0.94        |
| 1229999_23 | omy24 | 39486050 |                       | Summer temperature   | 0.241   | 0.42 | 1.00        |
| 623386_60  | omy25 | 3391624  |                       | Summer temperature   | 0.097   | 0.65 | 0.93        |
| 623386_71  | omy25 | 3391624  |                       | Summer temperature   | 0.097   | 0.65 | 0.93        |
| 208930_27  | omy25 | 13916916 |                       | Summer temperature   | 0.043   | 0.79 | 1.00        |
| 915533_16  | omy25 | 18879590 |                       | Summer temperature   | 0.232   | 0.43 | 1.00        |
| 454429_18  | omy25 | 19960092 |                       | Summer temperature   | 0.349   | 0.29 | 0.95        |
| 267663_74  | omy25 | 23152288 |                       | Summer temperature   | 0.161   | 0.53 | 0.88        |
| 267663_73  | omy25 | 23152288 |                       | Summer temperature   | 0.163   | 0.53 | 0.89        |
| 529804_73  | omy25 | 43187198 |                       | Summer temperature   | 0.346   | 0.29 | 1.00        |
| 1111193_31 | omy25 | 65419329 |                       | Summer temperature   | 0.261   | 0.39 | 0.94        |
| 1200267_58 | omy25 | 65419477 |                       | Summer temperature   | 0.312   | 0.33 | 0.76        |
| 1172383_28 | omy25 | 73556718 |                       | Summer temperature   | 0.343   | 0.30 | 0.86        |
| 1097278_38 | omy25 | 74398833 |                       | Summer temperature   | 0.357   | 0.28 | 0.83        |
| 1232448_21 | omy26 | 3275231  |                       | Summer temperature   | 0.306   | 0.34 | 0.94        |
| 1023792_33 | omy26 | 9526680  |                       | Summer temperature   | 0.382   | 0.26 | 0.88        |
| 958226_5   | omy26 | 9739368  | ATS18_MOUSE;          | Summer temperature   | 0.478   | 0.18 | 0.94        |
| 102758_27  | omy26 | 25328165 |                       | Summer temperature   | 0.316   | 0.33 | 0.95        |
| 284544_58  | omy26 | 26012843 |                       | Summer temperature   | 0.039   | 0.81 | 0.94        |
| 687143_17  | omy26 | 26220117 |                       | Summer temperature   | 0.036   | 0.82 | 1.00        |
| 697447_33  | omy26 | 26252001 |                       | Summer temperature   | 0.048   | 0.78 | 0.85        |
| 891458_41  | omy27 | 1274364  |                       | Summer temperature   | 0.368   | 0.27 | 0.85        |
| 286707_50  | omy27 | 8737251  |                       | Summer temperature   | 0.339   | 0.30 | 0.83        |
| 391656_44  | omy27 | 9922489  | TBCEL_RAT;            | Summer temperature   | 0.333   | 0.31 | 0.90        |
| 746043_42  | omy27 | 11578587 |                       | Summer temperature   | 0.337   | 0.30 | 0.82        |
| 979686_30  | omy27 | 11580660 |                       | Summer temperature   | 0.312   | 0.33 | 0.76        |
| 290584_23  | omy27 | 11686018 |                       | Summer temperature   | 0.326   | 0.31 | 0.88        |

| Outlier    | Chr     | Chr_pos  | Candidate gene (5 kb) | Environment Variable | p-value | R2   | Allele_diff |
|------------|---------|----------|-----------------------|----------------------|---------|------|-------------|
| 1169079_7  | omy27   | 13394364 | TF21_SCHPO;           | Summer temperature   | 0.800   | 0.02 | 0.94        |
| 550596_59  | omy27   | 39888848 |                       | Summer temperature   | 0.254   | 0.40 | 1.00        |
| 962696_13  | omy28   | 5868655  | PRP6_BOVIN;           | Summer temperature   | 0.113   | 0.62 | 0.86        |
| 1278730_17 | omy28   | 10050610 |                       | Summer temperature   | 0.164   | 0.53 | 0.93        |
| 365942_29  | omy28   | 11593125 | ABHD3_HUMAN;          | Summer temperature   | 0.106   | 0.64 | 1.00        |
| 626736_59  | omy28   | 11627432 |                       | Summer temperature   | 0.091   | 0.67 | 0.93        |
| 394646_21  | omy28   | 11661062 |                       | Summer temperature   | 0.210   | 0.46 | 1.00        |
| 1073099_20 | omy28   | 11746944 |                       | Summer temperature   | 0.131   | 0.59 | 1.00        |
| 823291_35  | omy28   | 11749936 |                       | Summer temperature   | 0.074   | 0.71 | 0.95        |
| 692810_5   | omy28   | 12027198 |                       | Summer temperature   | 0.204   | 0.47 | 0.94        |
| 312814_8   | omy28   | 31498567 | CPN2_HUMAN;           | Summer temperature   | 0.339   | 0.30 | 0.67        |
| 241219_5   | omy29   | 36983269 |                       | Summer temperature   | 0.357   | 0.28 | 0.79        |
| 359430_47  | omy29   | 37675596 | F120B_HUMAN;          | Summer temperature   | 0.398   | 0.24 | 0.83        |
| 537531_13  | UNKNOWN | 4362     |                       | Summer temperature   | 0.141   | 0.57 | 0.95        |
| 537531_12  | UNKNOWN | 4362     |                       | Summer temperature   | 0.144   | 0.56 | 0.95        |
| 636524_11  | UNKNOWN | 5293     |                       | Summer temperature   | 0.357   | 0.28 | 0.83        |
| 826771_53  | UNKNOWN | 6413     |                       | Summer temperature   | 0.390   | 0.25 | 0.90        |
| 879243_14  | UNKNOWN | 9890     |                       | Summer temperature   | 0.185   | 0.49 | 1.00        |
| 710398_20  | UNKNOWN | 13254    |                       | Summer temperature   | 0.357   | 0.28 | 0.86        |
| 554197_59  | UNKNOWN | 13815    |                       | Summer temperature   | 0.004   | 0.95 | 1.00        |
| 490925_41  | UNKNOWN | 14143    |                       | Summer temperature   | 0.357   | 0.28 | 0.89        |
| 422670_10  | UNKNOWN | 15260    |                       | Summer temperature   | 0.257   | 0.39 | 0.94        |
| 808817_74  | UNKNOWN | 15564    |                       | Summer temperature   | 0.349   | 0.29 | 0.78        |

Note:

Allele\_diff is the largest difference in minor allele frequency across all populations.
