# Supplementary material for: Physiological and genomic signatures of evolutionary thermal adaptation in redband trout from extreme climates
Source: PubMed Central journal article supplement (PMC6183465; doi:10.1111/eva.12672), 2018-07-20
Supplement: EVA-11-1686-s005.pdf [file EVA-11-1686-s005.pdf]

**Table S2** Annotation of cardiac traits associated markers

| Traits                  | Ecotype      | CHR   | Signif. Window_pos | Cadidate genes           |
|-------------------------|--------------|-------|--------------------|--------------------------|
| TAB                     | Cold Montane | omy01 | 23719600-23739400  | YTX2_XENLA;              |
| TAB                     | Cold Montane | omy02 | 10975000-10993400  |                          |
| TAB                     | Cold Montane | omy04 | 3494400-3505200    |                          |
| TAB                     | Cold Montane | omy06 | 17984200-17994600  | PGH1_BOVIN;              |
| TAB                     | Cold Montane | omy06 | 19815800-19834800  |                          |
| TAB                     | Cold Montane | omy06 | 42382600-42394200  |                          |
| TAB                     | Cold Montane | omy07 | 62984400-63004200  | CAC1D_HUMAN;             |
| TAB                     | Cold Montane | omy09 | 42048600-42067800  |                          |
| TAB                     | Cold Montane | omy10 | 62702600-62717800  | LRBA_MOUSE;              |
| TAB                     | Cold Montane | omy11 | 26293600-26312200  |                          |
| TAB                     | Cold Montane | omy12 | 27551000-27565600  | SERPH_CHICK;             |
| TAB                     | Cold Montane | omy14 | 9216200-9235000    |                          |
| TAB                     | Cold Montane | omy14 | 11776200-11790800  | TM249_HUMAN; TC1A_CAEEL; |
| TAB                     | Cold Montane | omy14 | 58606200-58626000  |                          |
| TAB                     | Cold Montane | omy22 | 28117200-28137000  |                          |
| $f_{h,max@20^{\circ}C}$ | Cold Montane | omy01 | 68363600-68377200  |                          |
| $f_{h,max@20^{\circ}C}$ | Cold Montane | omy06 | 34363400-34380600  |                          |
| $f_{h,max@20^{\circ}C}$ | Cold Montane | omy07 | 62984400-63004200  | CAC1D_HUMAN;             |
| $f_{h,max@20^{\circ}C}$ | Cold Montane | omy09 | 10324800-10344400  | SVEP1_HUMAN;             |
| $f_{h,max@20^{\circ}C}$ | Cold Montane | omy09 | 30563400-30576000  |                          |
| $f_{h,max@20^{\circ}C}$ | Cold Montane | omy11 | 10513200-10532000  | GP183_RAT;               |
| $f_{h,max@20^{\circ}C}$ | Cold Montane | omy11 | 56698400-56709000  |                          |
| $f_{h,max@20^{\circ}C}$ | Cold Montane | omy13 | 38944600-38954800  |                          |
| $f_{h,max@20^{\circ}C}$ | Cold Montane | omy13 | 38945000-38962600  |                          |
| $f_{h,max@20^{\circ}C}$ | Cold Montane | omy16 | 12429400-12439600  | P4HA1_BOVIN;RTJK_DROME;  |
| $f_{h,max@20^{\circ}C}$ | Cold Montane | omy16 | 38547200-38562200  |                          |
| $f_{h,max@20^{\circ}C}$ | Cold Montane | omy16 | 48954000-48973800  | TMM82_XENLA; TC1A_CAEEL; |
| $f_{h,max@20^{\circ}C}$ | Cold Montane | omy18 | 30004200-30019400  |                          |
| $f_{h,max@20^{\circ}C}$ | Cold Montane | omy20 | 5317000-5327600    |                          |
| $f_{h,max@20^{\circ}C}$ | Cold Montane | omy21 | 44514400-44524800  | M4K2_HUMAN;              |
| $f_{h,max@20^{\circ}C}$ | Cold Montane | omy22 | 30353400-30365200  | PDCL3_RAT;               |
| peak_ $f_{h,max}$       | Cold Montane | omy04 | 70524800-70544600  |                          |
| peak_ $f_{h,max}$       | Cold Montane | omy06 | 13356800-13374600  |                          |
| peak_ $f_{h,max}$       | Cold Montane | omy06 | 13753800-13788600  | FBCD1_XENTR;             |
| peak_ $f_{h,max}$       | Cold Montane | omy06 | 34363400-34380600  |                          |
| peak_ $f_{h,max}$       | Cold Montane | omy07 | 37773800-37785200  |                          |
| peak_ $f_{h,max}$       | Cold Montane | omy08 | 56030200-56045400  |                          |
| peak_ $f_{h,max}$       | Cold Montane | omy09 | 7577200-7596800    | CASQ1_RAT;               |
| peak_ $f_{h,max}$       | Cold Montane | omy11 | 10513200-10532000  | GP183_RAT;               |
| peak_ $f_{h,max}$       | Cold Montane | omy11 | 34042600-34053800  |                          |
| peak_ $f_{h,max}$       | Cold Montane | omy18 | 40305200-40315600  | PGCA_RAT;                |
| peak_ $f_{h,max}$       | Cold Montane | omy19 | 13286600-13298800  |                          |
| peak_ $f_{h,max}$       | Cold Montane | omy21 | 44178600-44197400  |                          |
| peak_ $f_{h,max}$       | Cold Montane | omy24 | 9939000-9954800    |                          |

| Traits                         | Ecotype      | CHR   | Signif. Window_pos | Cadidate genes           |
|--------------------------------|--------------|-------|--------------------|--------------------------|
| peak_ $f_{h,max}$              | Cold Montane | omy24 | 9945000-9958200    |                          |
| TPEAK                          | Cold Montane | omy01 | 40212000-40224000  |                          |
| TPEAK                          | Cold Montane | omy02 | 18445600-18463200  |                          |
| TPEAK                          | Cold Montane | omy04 | 35544600-35554800  |                          |
| TPEAK                          | Cold Montane | omy04 | 35545000-35557600  |                          |
| TPEAK                          | Cold Montane | omy04 | 58363600-58374600  |                          |
| TPEAK                          | Cold Montane | omy06 | 34363400-34380600  |                          |
| TPEAK                          | Cold Montane | omy06 | 70117600-70136800  |                          |
| TPEAK                          | Cold Montane | omy07 | 19773800-19791600  | A4_TETFL;                |
| TPEAK                          | Cold Montane | omy08 | 18197800-18211400  |                          |
| TPEAK                          | Cold Montane | omy09 | 21543800-21554800  |                          |
| TPEAK                          | Cold Montane | omy09 | 21545000-21558200  |                          |
| TPEAK                          | Cold Montane | omy09 | 27566000-27585800  |                          |
| TPEAK                          | Cold Montane | omy10 | 25901200-25917000  |                          |
| TPEAK                          | Cold Montane | omy10 | 30614400-30625800  | RBMX2_MOUSE;GP119_MOUSE; |
| TPEAK                          | Cold Montane | omy10 | 41541600-41554800  | NFRKB_MOUSE;             |
| TPEAK                          | Cold Montane | omy10 | 41545000-41558600  | NFRKB_MOUSE;             |
| TPEAK                          | Cold Montane | omy11 | 50753800-50770400  | GL1D1_PONAB;             |
| TPEAK                          | Cold Montane | omy12 | 33823800-33834800  | TRI37_MOUSE;             |
| TPEAK                          | Cold Montane | omy15 | 6811200-6823000    |                          |
| TPEAK                          | Cold Montane | omy16 | 21863400-21883200  | PUS3_BOVIN;              |
| TPEAK                          | Cold Montane | omy16 | 22102400-22118600  |                          |
| TPEAK                          | Cold Montane | omy17 | 19675400-19689000  | CARD8_HUMAN;             |
| TPEAK                          | Cold Montane | omy17 | 68874600-68894400  |                          |
| TPEAK                          | Cold Montane | omy20 | 32004200-32015200  |                          |
| TPEAK                          | Cold Montane | omy21 | 44178600-44197400  |                          |
| TPEAK                          | Cold Montane | omy22 | 28117200-28137000  |                          |
| TPEAK                          | Cold Montane | omy24 | 14588600-14605400  |                          |
| TPEAK                          | Cold Montane | omy29 | 20268600-20288400  |                          |
| TPEAK                          | Cold Montane | omy29 | 28876000-28894400  |                          |
| TPEAK                          | Cold Montane | omy29 | 31554200-31564200  | ADT2_RAT;DFP_MANSE;      |
| TAB                            | Cool Montane | omy03 | 20114000-20131800  |                          |
| TAB                            | Cool Montane | omy08 | 19122000-19138400  |                          |
| TAB                            | Cool Montane | omy08 | 23976400-23993800  |                          |
| TAB                            | Cool Montane | omy10 | 42161800-42181400  | IF1AX_HUMAN;             |
| TAB                            | Cool Montane | omy12 | 40925000-40942000  |                          |
| TAB                            | Cool Montane | omy14 | 49606400-49620600  |                          |
| TAB                            | Cool Montane | omy15 | 2912400-2924800    | TRPA1_HUMAN;             |
| TAB                            | Cool Montane | omy15 | 4040600-4053400    |                          |
| TAB                            | Cool Montane | omy17 | 65664200-65674400  |                          |
| TAB                            | Cool Montane | omy19 | 25760000-25777000  |                          |
| TAB                            | Cool Montane | omy21 | 50571400-50585000  |                          |
| TAB                            | Cool Montane | omy25 | 24222800-24235400  |                          |
| $f_{h,max}@20^{\circ}\text{C}$ | Cool Montane | omy01 | 4601400-4621200    | WDR47_HUMAN;             |
| $f_{h,max}@20^{\circ}\text{C}$ | Cool Montane | omy01 | 26714600-26726200  |                          |
| $f_{h,max}@20^{\circ}\text{C}$ | Cool Montane | omy02 | 32936000-32954800  | OSBL5_HUMAN;             |

| Traits                        | Ecotype      | CHR   | Signif. Window_pos | Cadidate genes          |
|-------------------------------|--------------|-------|--------------------|-------------------------|
| <i>f<sub>h,max</sub>@20°C</i> | Cool Montane | omy02 | 32945000-32955600  |                         |
| <i>f<sub>h,max</sub>@20°C</i> | Cool Montane | omy03 | 18374200-18384200  |                         |
| <i>f<sub>h,max</sub>@20°C</i> | Cool Montane | omy04 | 22675200-22688800  |                         |
| <i>f<sub>h,max</sub>@20°C</i> | Cool Montane | omy06 | 24245400-24256600  |                         |
| <i>f<sub>h,max</sub>@20°C</i> | Cool Montane | omy10 | 13892000-13906200  |                         |
| <i>f<sub>h,max</sub>@20°C</i> | Cool Montane | omy12 | 2301600-2316200    |                         |
| <i>f<sub>h,max</sub>@20°C</i> | Cool Montane | omy12 | 39786800-39799400  |                         |
| <i>f<sub>h,max</sub>@20°C</i> | Cool Montane | omy12 | 58110200-58125400  |                         |
| <i>f<sub>h,max</sub>@20°C</i> | Cool Montane | omy13 | 26653800-26672800  |                         |
| <i>f<sub>h,max</sub>@20°C</i> | Cool Montane | omy13 | 29681400-29693800  |                         |
| <i>f<sub>h,max</sub>@20°C</i> | Cool Montane | omy15 | 14839200-14852200  |                         |
| <i>f<sub>h,max</sub>@20°C</i> | Cool Montane | omy15 | 32756600-32768200  |                         |
| <i>f<sub>h,max</sub>@20°C</i> | Cool Montane | omy16 | 43400800-43420600  | SYPH_HUMAN;CAC1F_HUMAN; |
| <i>f<sub>h,max</sub>@20°C</i> | Cool Montane | omy16 | 44752800-44762800  | F19A1_HUMAN;            |
| <i>f<sub>h,max</sub>@20°C</i> | Cool Montane | omy16 | 46158000-46169000  |                         |
| <i>f<sub>h,max</sub>@20°C</i> | Cool Montane | omy18 | 5185800-5198000    |                         |
| <i>f<sub>h,max</sub>@20°C</i> | Cool Montane | omy19 | 23233000-23245000  |                         |
| <i>f<sub>h,max</sub>@20°C</i> | Cool Montane | omy21 | 50571400-50585000  |                         |
| <i>f<sub>h,max</sub>@20°C</i> | Cool Montane | omy22 | 15239400-15251400  |                         |
| <i>f<sub>h,max</sub>@20°C</i> | Cool Montane | omy22 | 39488600-39502400  |                         |
| <i>f<sub>h,max</sub>@20°C</i> | Cool Montane | omy22 | 44336200-44354800  |                         |
| <i>f<sub>h,max</sub>@20°C</i> | Cool Montane | omy22 | 44345000-44356000  |                         |
| <i>f<sub>h,max</sub>@20°C</i> | Cool Montane | omy23 | 16204400-16215800  | HMX2_MOUSE;             |
| <i>f<sub>h,max</sub>@20°C</i> | Cool Montane | omy23 | 43878600-43898400  |                         |
| <i>f<sub>h,max</sub>@20°C</i> | Cool Montane | omy23 | 44066600-44078800  | BIG3_HUMAN;             |
| <i>f<sub>h,max</sub>@20°C</i> | Cool Montane | omy24 | 9450600-9462600    | ZFYV1_MOUSE;            |
| <i>peak_f<sub>h,max</sub></i> | Cool Montane | omy01 | 11770600-11789000  | TRM13_MOUSE;ODB2_BOVIN; |
| <i>peak_f<sub>h,max</sub></i> | Cool Montane | omy01 | 45524200-45534600  |                         |
| <i>peak_f<sub>h,max</sub></i> | Cool Montane | omy01 | 62321600-62336200  |                         |
| <i>peak_f<sub>h,max</sub></i> | Cool Montane | omy04 | 6041600-6051800    |                         |
| <i>peak_f<sub>h,max</sub></i> | Cool Montane | omy04 | 22675200-22688800  |                         |
| <i>peak_f<sub>h,max</sub></i> | Cool Montane | omy07 | 11000000-11010600  |                         |
| <i>peak_f<sub>h,max</sub></i> | Cool Montane | omy08 | 45155400-45166600  |                         |
| <i>peak_f<sub>h,max</sub></i> | Cool Montane | omy08 | 57925400-57939400  |                         |
| <i>peak_f<sub>h,max</sub></i> | Cool Montane | omy09 | 46069600-46079600  | GBB1_DANRE;             |
| <i>peak_f<sub>h,max</sub></i> | Cool Montane | omy15 | 50539000-50550400  |                         |
| <i>peak_f<sub>h,max</sub></i> | Cool Montane | omy16 | 5361600-5381400    |                         |
| <i>peak_f<sub>h,max</sub></i> | Cool Montane | omy16 | 23909200-23926000  |                         |
| <i>peak_f<sub>h,max</sub></i> | Cool Montane | omy16 | 32598600-32610400  |                         |
| <i>peak_f<sub>h,max</sub></i> | Cool Montane | omy20 | 7256600-7276400    | ITB4_RAT;ITB4_MOUSE;    |
| <i>peak_f<sub>h,max</sub></i> | Cool Montane | omy22 | 2597400-2613800    |                         |
| <i>peak_f<sub>h,max</sub></i> | Cool Montane | omy22 | 2826600-2839200    |                         |
| <i>peak_f<sub>h,max</sub></i> | Cool Montane | omy22 | 3436200-3450200    |                         |
| <i>peak_f<sub>h,max</sub></i> | Cool Montane | omy22 | 45478000-45497400  | ERCC1_BOVIN;            |
| <i>peak_f<sub>h,max</sub></i> | Cool Montane | omy23 | 37971400-37990000  | PGRC1_PONAB;            |
| <i>peak_f<sub>h,max</sub></i> | Cool Montane | omy25 | 62189400-62201000  |                         |

| Traits                  | Ecotype      | CHR   | Signif. Window_pos | Cadidate genes |
|-------------------------|--------------|-------|--------------------|----------------|
| peak_f <sub>h,max</sub> | Cool Montane | omy28 | 2303400-2320400    | RHG12_HUMAN;   |
| peak_f <sub>h,max</sub> | Cool Montane | omy28 | 20688000-20707800  |                |
| peak_f <sub>h,max</sub> | Cool Montane | omy29 | 18374200-18388400  |                |
| TPEAK                   | Cool Montane | omy01 | 37344800-37354800  |                |
| TPEAK                   | Cool Montane | omy01 | 37345000-37357800  |                |
| TPEAK                   | Cool Montane | omy01 | 70006800-70017000  |                |
| TPEAK                   | Cool Montane | omy03 | 20981200-21001000  |                |
| TPEAK                   | Cool Montane | omy03 | 65743600-65753600  |                |
| TPEAK                   | Cool Montane | omy04 | 2183000-2194000    |                |
| TPEAK                   | Cool Montane | omy04 | 10777600-10804200  |                |
| TPEAK                   | Cool Montane | omy04 | 13071000-13083200  |                |
| TPEAK                   | Cool Montane | omy05 | 5806200-5826000    |                |
| TPEAK                   | Cool Montane | omy05 | 55892600-55904200  |                |
| TPEAK                   | Cool Montane | omy06 | 59684000-59701400  |                |
| TPEAK                   | Cool Montane | omy07 | 34415000-34427200  | GBB1_DANRE;    |
| TPEAK                   | Cool Montane | omy08 | 41752200-41765800  |                |
| TPEAK                   | Cool Montane | omy10 | 37220000-37239600  |                |
| TPEAK                   | Cool Montane | omy11 | 56988800-57006000  |                |
| TPEAK                   | Cool Montane | omy12 | 43585000-43599200  |                |
| TPEAK                   | Cool Montane | omy12 | 81472600-81484400  |                |
| TPEAK                   | Cool Montane | omy15 | 5185600-5196200    |                |
| TPEAK                   | Cool Montane | omy15 | 7670200-7690000    | PCY1B_MOUSE;   |
| TPEAK                   | Cool Montane | omy15 | 30418200-30435400  |                |
| TPEAK                   | Cool Montane | omy15 | 57636800-57648800  |                |
| TPEAK                   | Cool Montane | omy16 | 15289000-15300400  |                |
| TPEAK                   | Cool Montane | omy16 | 44477000-44496400  |                |
| TPEAK                   | Cool Montane | omy17 | 46201800-46214800  | S61A2_ONCMY;   |
| TPEAK                   | Cool Montane | omy17 | 59447000-59459600  |                |
| TPEAK                   | Cool Montane | omy19 | 10489400-10502000  | CEP44_XENLA;   |
| TPEAK                   | Cool Montane | omy19 | 41580000-41590000  | PUA1C_SALSA;   |
| TPEAK                   | Cool Montane | omy19 | 50535800-50552000  |                |
| TPEAK                   | Cool Montane | omy20 | 10009600-10028200  |                |
| TPEAK                   | Cool Montane | omy20 | 40046000-40058200  |                |
| TPEAK                   | Cool Montane | omy21 | 2536400-2547200    |                |
| TPEAK                   | Cool Montane | omy21 | 24227200-24242200  | SO1C1_HUMAN;   |
| TPEAK                   | Cool Montane | omy22 | 3895600-3907600    |                |
| TPEAK                   | Cool Montane | omy22 | 11199800-11216600  |                |
| TPEAK                   | Cool Montane | omy23 | 11956000-11966000  |                |
| TPEAK                   | Cool Montane | omy23 | 26593400-26607600  |                |
| TPEAK                   | Cool Montane | omy23 | 40074600-40089600  |                |
| TPEAK                   | Cool Montane | omy23 | 47722400-47735200  |                |
| TPEAK                   | Cool Montane | omy24 | 18185000-18204600  |                |
| TPEAK                   | Cool Montane | omy25 | 19279800-19317000  | ADA1B_MESAU;   |
| TPEAK                   | Cool Montane | omy25 | 31353000-31372800  | SCND3_HUMAN;   |
| TPEAK                   | Cool Montane | omy25 | 53791200-53804000  |                |
| TPEAK                   | Cool Montane | omy29 | 24073400-24084600  |                |

| Traits                         | Ecotype      | CHR   | Signif. Window_pos | Candidate genes        |
|--------------------------------|--------------|-------|--------------------|------------------------|
| T <sub>PEAK</sub>              | Cool Montane | omy29 | 25760000-25774800  |                        |
| T <sub>AB</sub>                | Desert       | omy05 | 69099800-69115200  |                        |
| T <sub>AB</sub>                | Desert       | omy10 | 15851600-15862800  |                        |
| T <sub>AB</sub>                | Desert       | omy14 | 64373000-64384000  |                        |
| T <sub>AB</sub>                | Desert       | omy15 | 11532400-11542600  | ABHDA_HUMAN;           |
| T <sub>AB</sub>                | Desert       | omy15 | 18676000-18689200  |                        |
| T <sub>AB</sub>                | Desert       | omy15 | 26757400-26768000  | DLGP1_HUMAN;           |
| T <sub>AB</sub>                | Desert       | omy18 | 35427200-35443200  |                        |
| T <sub>AB</sub>                | Desert       | omy29 | 20268600-20288400  |                        |
| <i>f<sub>h,max@20°C</sub></i>  | Desert       | omy18 | 36616000-36628800  |                        |
| <i>f<sub>h,max@20°C</sub></i>  | Desert       | omy20 | 28854600-28874200  |                        |
| peak_ <i>f<sub>h,max</sub></i> | Desert       | omy06 | 35391200-35403400  |                        |
| peak_ <i>f<sub>h,max</sub></i> | Desert       | omy25 | 28002600-28018600  | RAN_SALSA;             |
| T <sub>PEAK</sub>              | Desert       | omy01 | 43374400-43384600  |                        |
| T <sub>PEAK</sub>              | Desert       | omy01 | 57319000-57337200  | KCIP2_MUSPF;           |
| T <sub>PEAK</sub>              | Desert       | omy02 | 71593000-71604800  | REP15_HUMAN;           |
| T <sub>PEAK</sub>              | Desert       | omy02 | 71909200-71924000  |                        |
| T <sub>PEAK</sub>              | Desert       | omy03 | 16842000-16853000  |                        |
| T <sub>PEAK</sub>              | Desert       | omy04 | 16956200-16970800  | ENL_HUMAN;             |
| T <sub>PEAK</sub>              | Desert       | omy06 | 7113000-7126000    |                        |
| T <sub>PEAK</sub>              | Desert       | omy06 | 42911600-42921600  |                        |
| T <sub>PEAK</sub>              | Desert       | omy08 | 71277600-71297400  | HMHA1_HUMAN;           |
| T <sub>PEAK</sub>              | Desert       | omy13 | 11876800-11894800  | TITIN_MOUSE;           |
| T <sub>PEAK</sub>              | Desert       | omy13 | 22089600-22106800  |                        |
| T <sub>PEAK</sub>              | Desert       | omy18 | 35897000-35910000  | C3AR_DANRE;TCB1_CAEBR; |

**Note:**

T<sub>AB</sub> : Arrhenius breakpoint temperature

T<sub>peak</sub> : Temperature of peak\_*f<sub>h,max</sub>*

*f<sub>h,max@20°C</sub>*: maximum heart rate at 20°C

peak\_*f<sub>h,max</sub>*: peak maximum heart rate
